# Supplementary material for: Examination of the Effectiveness of Controlled Release Fertilizer to Balance Sugarcane Yield and Reduce Nitrate Leaching to Groundwater
Source: MDPI journal article supplement (doi:10.3390/agronomy12030695), 2022-03-13
Supplement: s1 [file s1]

**Table S1.** Comparison of TDW of treatments between plant cane and ratoon season.

| ANOVA             |             |    |                |             |         |              |
|-------------------|-------------|----|----------------|-------------|---------|--------------|
| Treatment         |             | df | Sum of squares | Mean square | F value | Significance |
| N-free            | Crop season | 1  | 10.104         | 10.104      | 131.4   | ***          |
| Plant cane-Ratoon | Residuals   | 14 | 1.077          | 0.077       |         |              |
| Urea              | Crop season | 1  | 184.8          | 184.83      | 221.2   | ***          |
| Plant cane-Ratoon | Residuals   | 14 | 11.7           | 0.84        |         |              |
| CRF               | Crop season | 1  | 311.57         | 311.57      | 57.16   | ***          |
| Plant cane-Ratoon | Residuals   | 14 | 76.31          | 5.45        |         |              |

Significancy codes: 0 '\*\*\*' 0.001

**Table S2.** Comparison of TDW between treatments in plant cane season.

| ANOVA     |    |                |             |         |              |
|-----------|----|----------------|-------------|---------|--------------|
|           | df | Sum of squares | Mean square | F value | Significance |
| Treatment | 2  | 70.82          | 35.41       | 809.1   | ***          |
| Residuals | 21 | 0.92           | 0.04        |         |              |

  

| LSD                      |                 |         |              |                         |             |
|--------------------------|-----------------|---------|--------------|-------------------------|-------------|
| Treatment comparison     | Mean difference | p value | Significance | 95% Confidence Interval |             |
|                          |                 |         |              | Lower bound             | Upper bound |
| Plant cane N-free - Urea | -3.3399053      | 0e+00   | ***          | -3.6120025              | -3.067808   |
| Plant cane N-free - CRF  | 3.8861862       | 0e+00   | ***          | 3.6140890               | 4.158283    |
| Plant cane Urea - CRF    | 0.5462808       | 1e-04   | ***          | 0.2741837               | 0.818378    |

Significancy codes: 0 '\*\*\*' 0.001

**Table S3.** Comparison of TDW between treatments in ratoon season.

| ANOVA     |    |                |             |         |              |
|-----------|----|----------------|-------------|---------|--------------|
|           | df | Sum of squares | Mean square | F value | Significance |
| Treatment | 2  | 542.4          | 271.2       | 64.6    | ***          |
| Residuals | 21 | 88.2           | 4.2         |         |              |

  

| LSD                  |                 |         |              |                         |             |
|----------------------|-----------------|---------|--------------|-------------------------|-------------|
| Treatment comparison | Mean difference | p value | Significance | 95% Confidence Interval |             |
|                      |                 |         |              | Lower bound             | Upper bound |
| Ratoon N-free - urea | -8.548181       | 0.0000  | ***          | -11.21327920            | -5.883082   |
| Ratoon N-free - CRF  | 11.122470       | 0.0000  | ***          | 8.45737138              | 13.787569   |
| Ratoon Urea - CRF    | 2.574289        | 0.0606  | .            | -0.09080922             | 5.239388    |

Significancy codes: 0 '\*\*\*' 0.001 ' ' 0.1
